# Supplementary material for: To weight or not to weight: assessing sensitivities of climate model weighting to multiple methods, variables, and domains
Source: Copernicus journal article supplement (doi:10.5194/esd-2022-15), 2022-04-22

# CMIP5 Mean Change vs. interannual variability and intermodel spread – pr

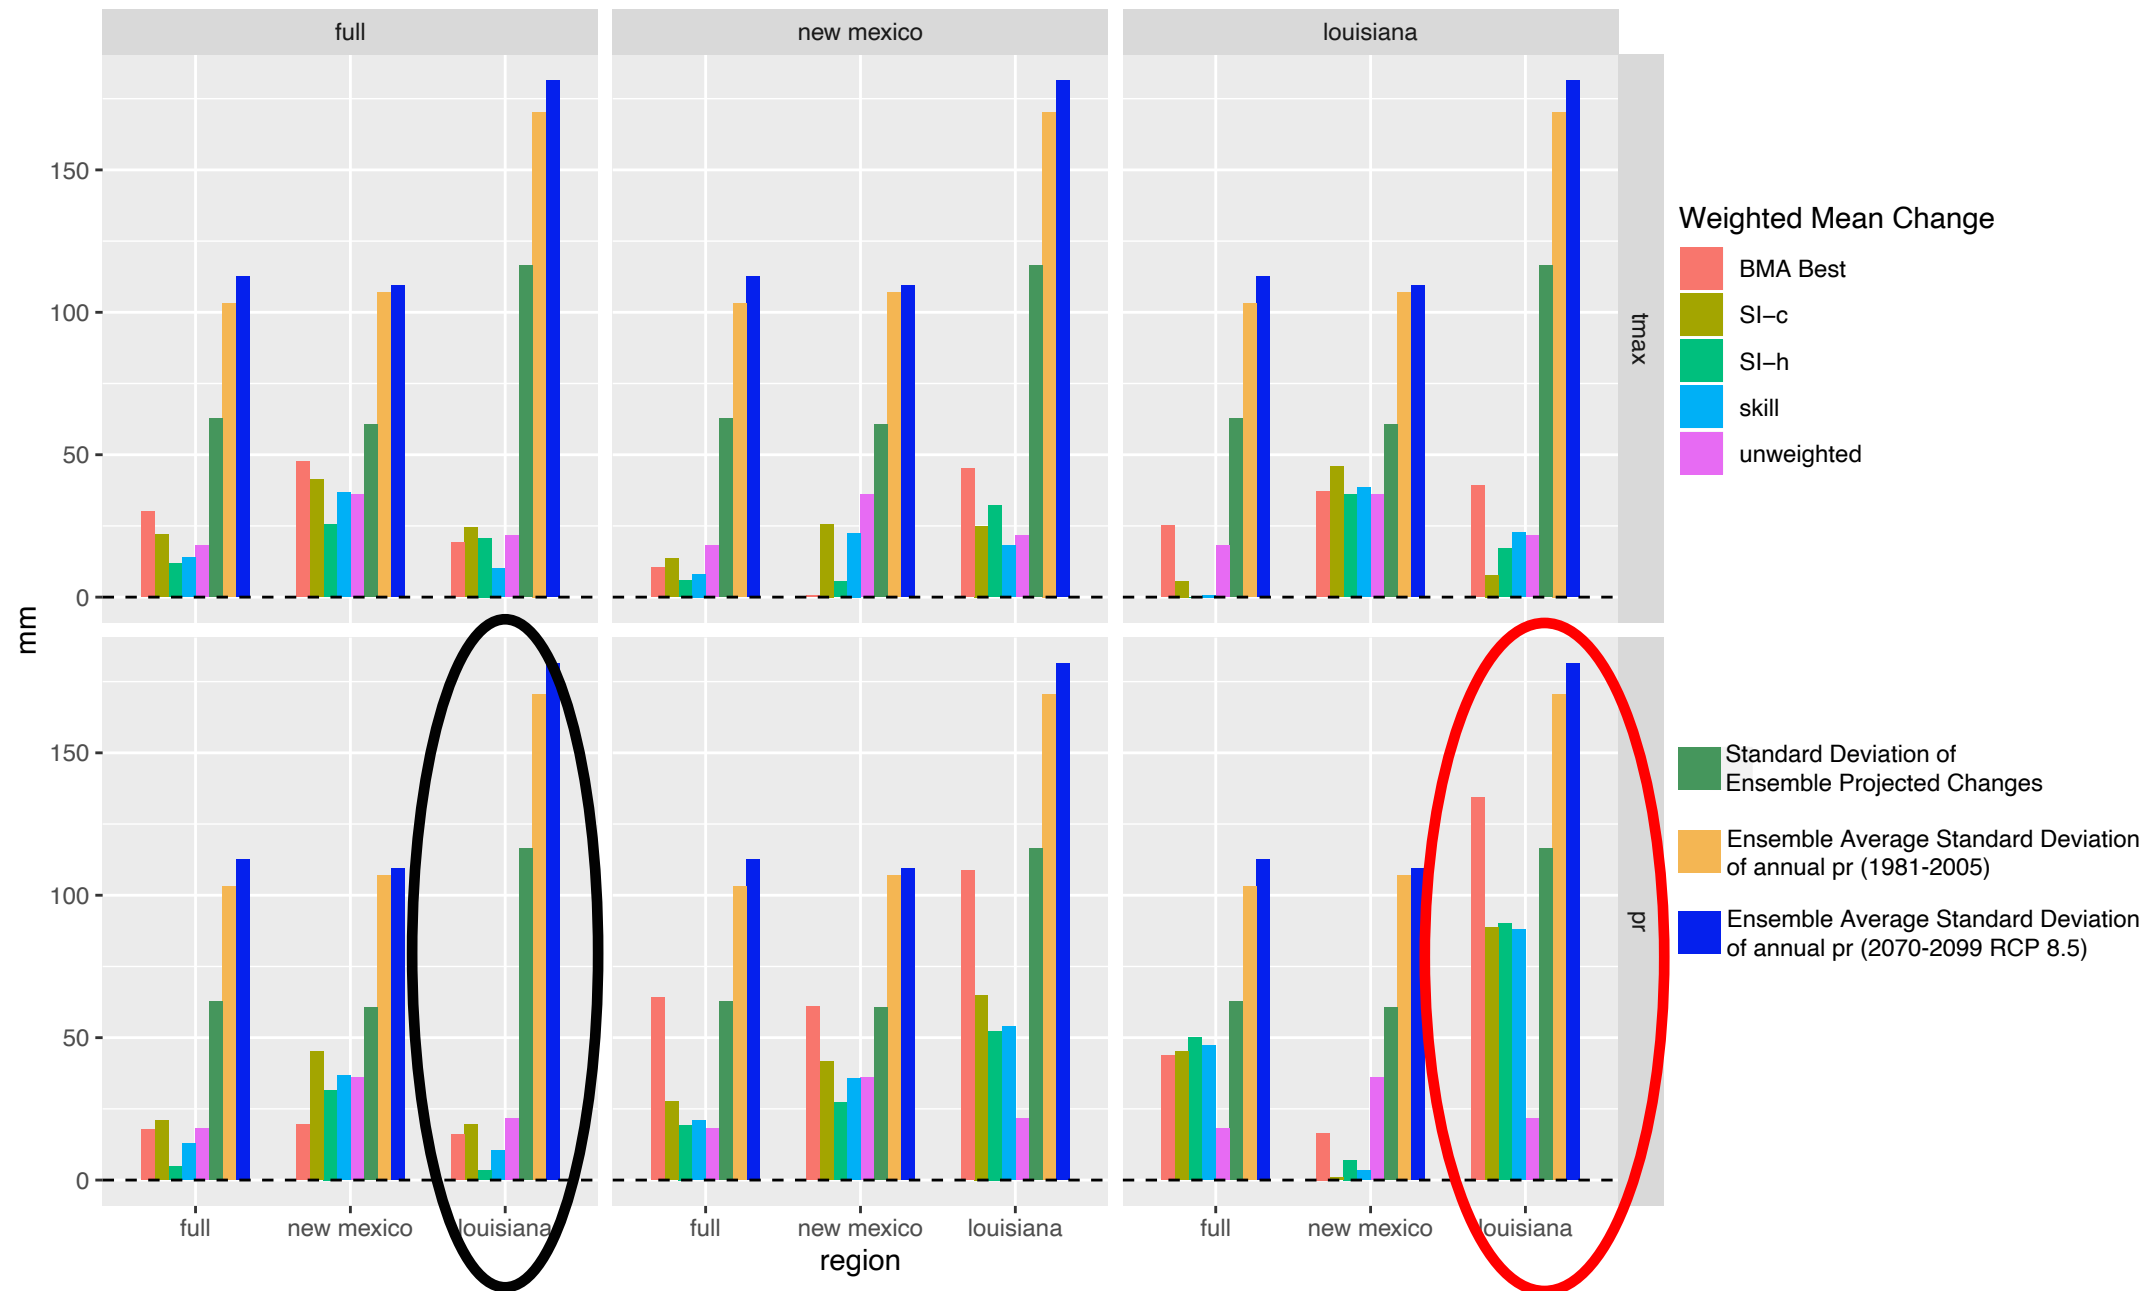

Supplement: Supplementary file [file esd-2022-15-AC1-supplement.pdf]
